# Supplementary material for: Nurses’ Knowledge and Attitude Caring for Patients With Diabetic Foot
Source: Research Square preprint supplement (doi:10.21203/rs.3.rs-8004897/v1), 2025-12-15
Supplement: Supplementary file 1 [file 391e20332599b063d032dbca.docx]

**Table 3. Distribution of Nurses' Responses to Diabetic Foot Information**

| **Diabetic Foot Information Items** | **False** | **Don't know** | **True** |
| --- | --- | --- | --- |
| 1. Poor glycemic control, presence of peripheral neuropathy and peripheral arterial disease, structural deformity of the foot, and smoking increase the risk of diabetic foot. |  |  |  |
| 2. 15 g monofilament test, reflexes, tactile sensory examination and vibration are performed during foot examinatibon for neuropathy. |  |  |  |
| 3. Diabetic patients should have a detailed foot examination at least once a year and the diabetic foot should be examined for risk factors. |  |  |  |
| 4. The follow-up and treatment of patients with diabetic foot ulcers or those at high risk should be performed by a multidisciplinary team. |  |  |  |
| 5. Shoe striking in the neuropathic foot can easily trigger ulcer development. |  |  |  |
| 6. Callus development in the diabetic foot does not pose a risk for infection |  |  |  |
| 7. Ischemia due to peripheral arterial disease prevents tissue healing and may cause gangrene and amputation. |  |  |  |
| 8. Charcot foot is one of the most devastating foot complications of diabetes with neuropathic bone fractures and joint disease. |  |  |  |
| 9. Diabetic foot infection often causes systemic findings such as fever and leukocytosis. |  |  |  |
| 10. Daily or more frequent wound cleaning and changing dressings have a positive effect on wound care. |  |  |  |
| 11. Dressings containing antimicrobials should not be used to prevent secondary infections or to accelerate wound healing. |  |  |  |
| 12. If the wound is stepped on, permanent damage occurs at the wound site due to stress and sudden pressure. |  |  |  |
| 13. Hyperbaric oxygen therapy (HBOT) is used as an adjunctive treatment to promote wound healing and prevent amputation in patients with diabetic foot ulcers, but it does not have a significant effect. |  |  |  |
| 14. PEDIS and/or WAGNER Classification is used in the detection and evaluation of diabetic foot.. |  |  |  |
| 15. The infectious agent in diabetic foot ulcers is usually gram positive cocci and most commonly Streptococci. |  |  |  |
| 16. There is no need to provide preventive foot care education to all diabetics. |  |  |  |
| 17. Peripheral arterial disease in patients with diabetes typically affects the vessels between the knee and ankle. |  |  |  |
| 18. Adequate circulation after ulcer formation is sufficient for healing, even if there is a mechanical load on it. |  |  |  |
| 19. Patients with Charcot's foot should be placed in a plaster cast until the skin temperature is normalized. |  |  |  |
| 20. Failure to obtain foot pulses is considered high risk. |  |  |  |
| 21. There are low, medium and high risk groups in diabetic foot risk diagnosis. |  |  |  |
| 22. Osteomyelitis is an important problem of chronic wound and the most definitive treatment is resection of infected and necrotic bone. |  |  |  |
| 23.Revascularization should be performed by radiological or surgical methods in tissues with insufficient oxygenation |  |  |  |
| 24. The presence of purulent secretion is sufficient for the diagnosis of infection. |  |  |  |
| 25. The use of larvae (maggot) is useful for the removal of necrotic tissue in the wound. |  |  |  |
| 26. Diabetic foot evaluation should be done in terms of temperature, hydration, edema, pulses, nails and toes. |  |  |  |
| 27. Diabetic foot is considered low risk only in the absence of amputation in risk diagnosis. |  |  |  |
| 28. Appropriate footwear should be worn according to the level of deformity and activity. |  |  |  |
| 29. Diabetic ischemic ulcers are less painful than diabetic neuropathic ulcers. |  |  |  |
| 30. Presence of sensation, presence of foot pulse, absence of deformity, absence of past history of foot ulcers and absence of amputation are considered low risk. |  |  |  |

*PEDIS ('Perfusion, Extent, Depth, Infection and Sensation')*

**Statements shown in bold are highlighted to show that they were answered incorrectly to a large extent.*

This form was developed by the authors for the current study and has not been previously published. It was reviewed by three faculty members (one endocrinology specialist and two internal medicine nursing specialists) for content validity.
